# Supplementary material for: Cysteamine/Cystamine Exert Anti-Mycobacterium abscessus Activity Alone or in Combination with Amikacin
Source: MDPI journal article supplement (doi:10.3390/ijms24021203), 2023-01-07
Supplement: s1 [file s1]

## Supplementary Figure S2

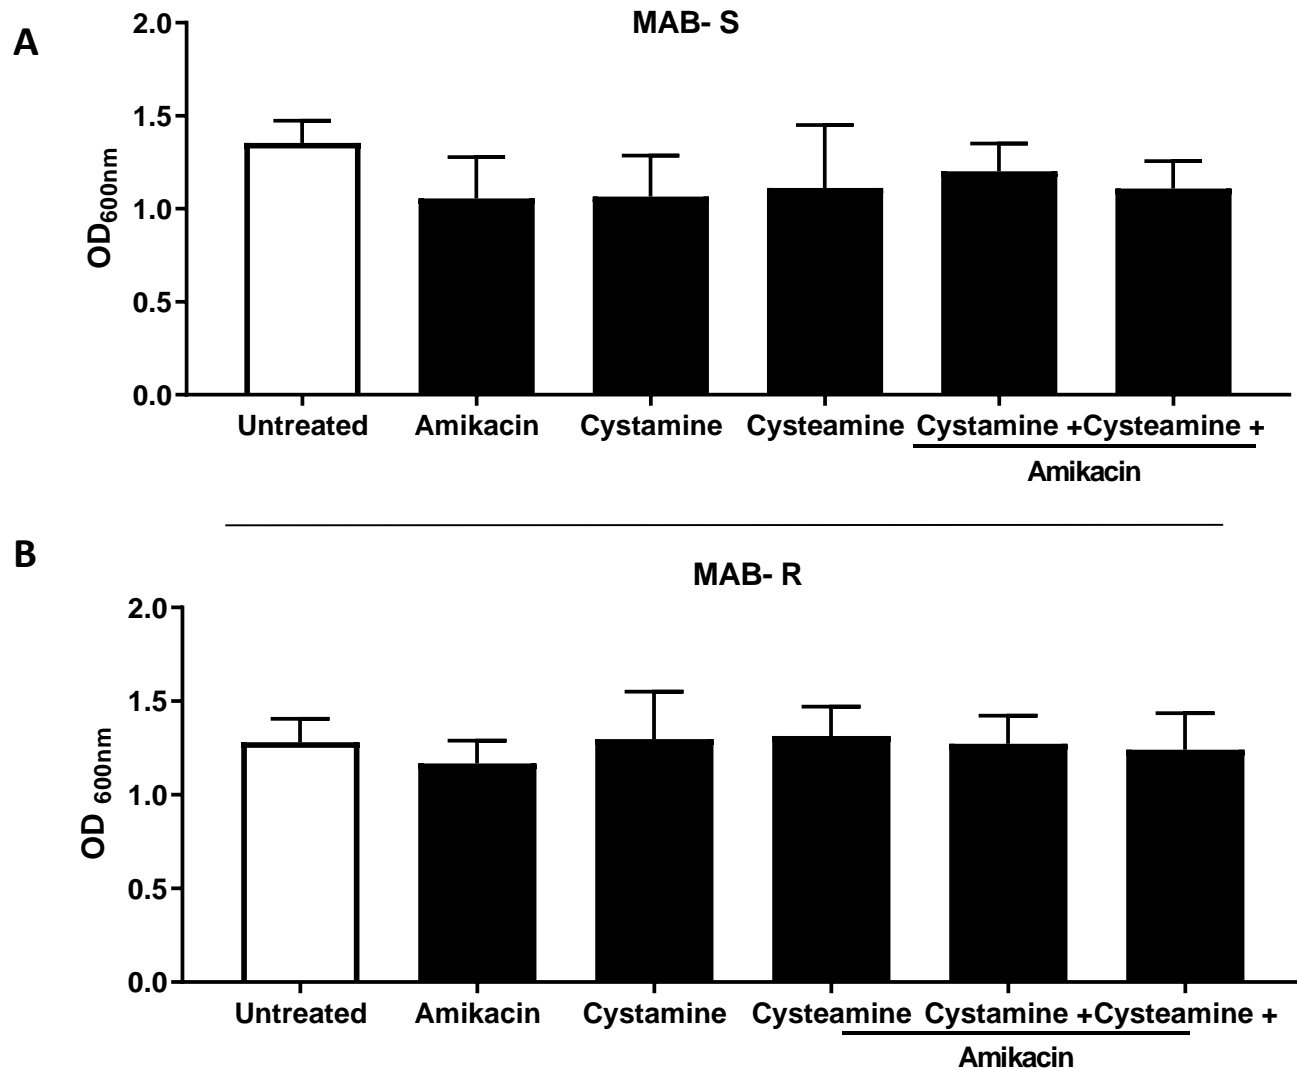

**Supplementary Figure S2: LDH cytotoxicity assay:** Supernatants from PBMCs infected with *M. abscessus* S (A) and R (B) variants were assayed for LDH to determine cytotoxicity. The results are presented as the mean  $\pm$  standard deviation of OD of three independent experiments. No statistically significant differences were observed between groups. # LDH, lactate dehydrogenase.
