# Supplementary material for: Cysteamine/Cystamine Exert Anti-Mycobacterium abscessus Activity Alone or in Combination with Amikacin
Source: MDPI journal article supplement (doi:10.3390/ijms24021203), 2023-01-07
Supplement: s1 [file s1]

**A**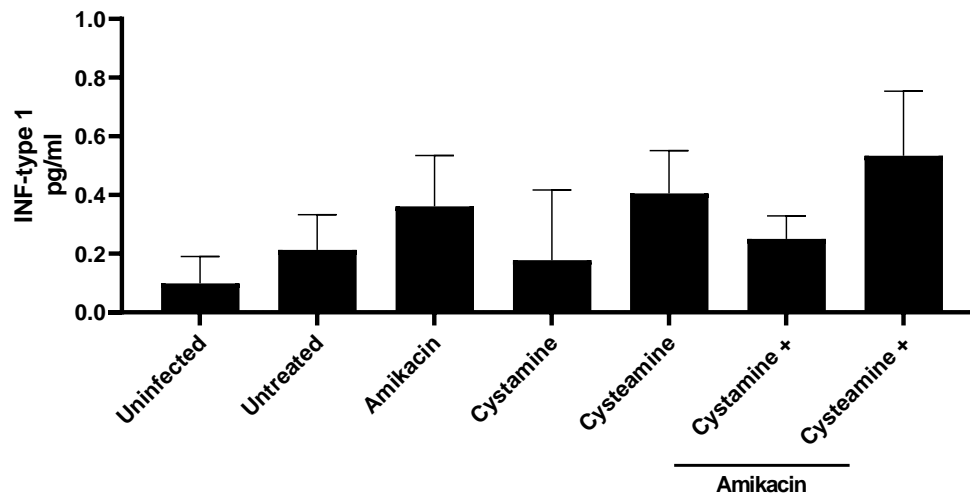**B**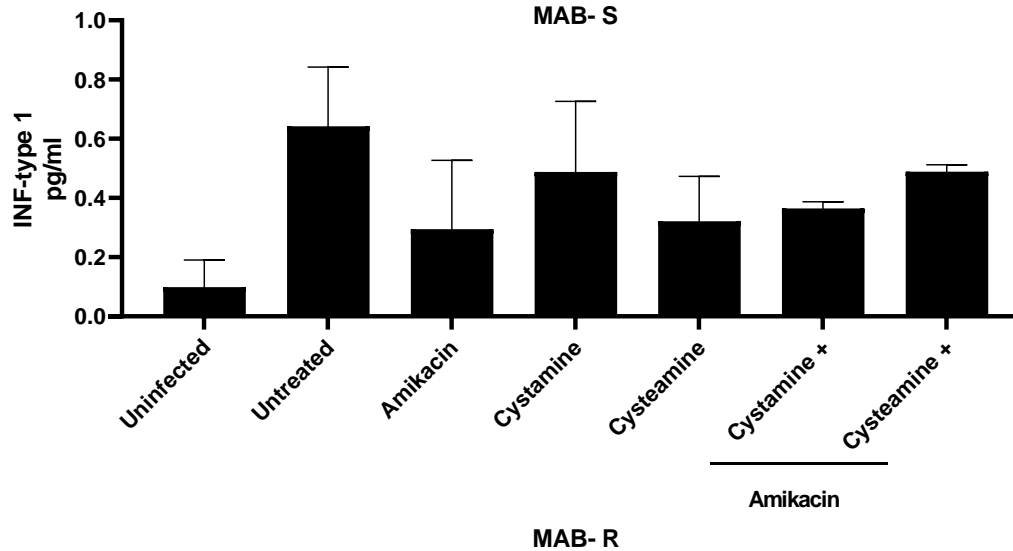

**Supplementary Figure S3: Evaluation of Type I IFN:** HEK-blue  $\alpha/\beta$  cells were treated with supernatants of PBMCs infected with MAB-S (A) and MAB-R (B) strains strain at 12 days p.i. and production of SEAP in culture medium was determined and measured at 630 nm optical density (O.D.). Data are expressed as mean  $\pm$  standard deviation of OD for at least two independent experiments. P- values were determined One ANOVA Dunnett's multiple comparisons test and no statistically significant differences were observed between groups.
